# Supplementary material for: Recurrence Rates After Microvascular Decompression in Patients With Primary Trigeminal Neuralgia and Its Influencing Factors: A Systematic Review and Meta-Analysis Based on 8,172 Surgery Patients
Source: PubMed Central journal article supplement (PMC8514877; doi:10.3389/fneur.2021.738032), 2021-09-30
Supplement: Data_Sheet_1.pdf [file Data_Sheet_1.pdf]

## *Supplementary Material*

**Supplementary Table 1. Search strategies used in the databases of PubMed and EMBASE.**

| <b>Online databases</b> | <b>Search strategy</b>                                                                                                                                                                                                                                                                                                                                                                                                                                                                                                                                                                                                                   |
|-------------------------|------------------------------------------------------------------------------------------------------------------------------------------------------------------------------------------------------------------------------------------------------------------------------------------------------------------------------------------------------------------------------------------------------------------------------------------------------------------------------------------------------------------------------------------------------------------------------------------------------------------------------------------|
| PubMed                  | <p>(((((“Trigeminal Neuralgia”[MeSH] OR “epileptiform neuralgia” OR “face ague” OR forthegill OR “Fothergill's neuralgia” OR prosopalgia OR “tic douloureux” OR “tortua facies” OR “trismus dolorificus”)) AND (“Microvascular Decompression Surgery”[MeSH] OR MVD OR “microvascular decompression”)) AND (Recurrence[MeSH] OR “Treatment Outcome” [MeSH] OR prognosis OR “curative effect*” OR “clinical effect*” OR “therapeutic value*” OR “pain rate” OR “therapeutic effect” OR Factor* OR postoperat* OR rate* OR Efficacy OR effect* OR impact OR Evaluation OR Outcome* OR value*)) NOT ((animals not (humans and animals)))</p> |
| EMBASE                  | <p>('trigeminal neuralgia' OR 'epileptiform neuralgia' OR 'face ague' OR forthegill OR 'fothergill* neuralgia' OR prosopalgia OR 'tic douloureux' OR 'tortua facies' OR 'trismus dolorificus') AND ('microvascular decompression surgery' OR mvd OR 'microvascular decompression') AND (recurrence OR 'treatment outcome' OR prognosis OR 'curative effect*' OR 'clinical effect*' OR 'therapeutic value*' OR 'pain rate' OR 'therapeutic effect' OR factor* OR postoperat* OR rate* OR efficacy OR effect* OR impact OR evaluation OR outcome* OR value*) NOT (rat* OR mice)</p>                                                        |

**Supplementary Table 2. Characteristics of the included studies.**

| Author           | Year | Country | Follow-up        | Age       | Duration  | Male/Female | Left/Right | Preoperative | N   | T   | Recurrence | Study type  | Tool | Grades | Potential Bias                            |
|------------------|------|---------|------------------|-----------|-----------|-------------|------------|--------------|-----|-----|------------|-------------|------|--------|-------------------------------------------|
|                  |      |         | time(months)     | (years)   | (years)   |             |            | treatments   |     |     | rate       |             |      |        |                                           |
| Sun T            | 1994 | Japan   | 80(13-126)       | 19-84     | 0.25-22   | 20/41       | 28/33      | Group 2      | 10  | 56  | 17.86%     | Case series | NIH  | 9      | Interviewer, recall, responder            |
| Li SQ            | 1998 | China   | 40.8(3-144)      | 30-78     | 0.25-30   | 105/82      | 75/112     | Group 4      | 33  | 187 | 17.65%     | Case series | NIH  | 7      | Interviewer, recall, responder            |
| Kondo A          | 2001 | Japan   | 150(60-240)      | /         | /         | 104/177     | /          | Group 4      | 23  | 281 | 8.19%      | Case series | NIH  | 6      | Interviewer, recall, responder            |
| Javadpour M      | 2003 | America | 61(33-110)       | 17-90     | 1-30      | /           | /          | Group 3      | 9   | 78  | 11.54%     | Case series | NIH  | 7      | Interviewer, recall, responder            |
| Li ST            | 2004 | China   | 13(10-27)        | 35-84     | 0.08-15   | 19/43       | 16/46      | Group 2      | 2   | 45  | 4.44%      | Case series | NIH  | 7      | Interviewer, recall, selection, responder |
| Liang WB         | 2008 | China   | 24               | 17-79     | 1-12      | 98/121      | /          | Group 4      | 25  | 219 | 11.42%     | Case series | NIH  | 7      | Interviewer, recall, responder            |
| Sekula RF        | 2008 | America | 48(44-52)        | 17-88     | /         | /           | /          | Group 4      | 12  | 48  | 25.00%     | Case series | NIH  | 6      | Interviewer, recall, responder            |
| Miller JP        | 2009 | America | 24               | /         | /         | 38/106      | /          | Group 4      | 25  | 144 | 17.36%     | Case series | NIH  | 6      | Interviewer, recall, responder            |
| Qin ZZ           | 2010 | China   | 25(3-46)         | 31-65     | 0.25-7    | 12/20       | 10/22      | Group 1      | 2   | 32  | 6.25%      | Case series | NIH  | 7      | Interviewer, recall, responder            |
| Huang QJ         | 2011 | China   | 33(6-60)         | 35-71     | 0.5-20    | 90/71       | 64/97      | Group 4      | 31  | 161 | 19.25%     | Case series | NIH  | 7      | Interviewer, recall, responder            |
| Hua S            | 2012 | China   | 21.5(12-34)      | 31 -85    | 0.5-30    | 18/49       | 25/42      | Group1       | 1   | 67  | 1.49%      | Case series | NIH  | 7      | Interviewer, recall, responder            |
| Xie HW           | 2012 | China   | 28.2(25.2-31.2)  | 40-82     | 0.25-27   | 51/92       | /          | Group 3      | 7   | 125 | 5.60%      | Case series | NIH  | 7      | Interviewer, recall, responder            |
| Jiang WM         | 2014 | China   | 24(12-36)        | /         | 0.17-13   | 22/46       | 20/48      | Group4       | 12  | 68  | 17.65%     | Case series | NIH  | 6      | Interviewer, recall, selection, responder |
| Wang TJ          | 2014 | China   | 28(12-67)        | 26-78     | 0.2-30    | 91/110      | 82/119     | Group 2      | 11  | 187 | 5.88%      | Case series | NIH  | 6      | Interviewer, recall, selection, responder |
| Tang SQ          | 2014 | China   | 12               | 34-75     | /         | 54/53       | 51/56      | Group 2      | 9   | 107 | 8.41%      | Case series | NIH  | 9      | Interviewer, recall, responder            |
| Zhou WD          | 2015 | China   | 36(12-60)        | 33-76     | 0.5-18    | 72/112      | 81/103     | Group 4      | 34  | 184 | 18.48%     | Case series | NIH  | 6      | Interviewer, recall, selection, responder |
| Qiao QL          | 2015 | China   | 26.5(5-48)       | 32-65     | 0.58-12   | 58/62       | 60/60      | Group 4      | 25  | 120 | 20.83%     | Case series | NIH  | 7      | Interviewer, recall, responder            |
| Martinez-Anda JJ | 2015 | Mexico  | 36(3-120)        | /         | /         | 81/190      | 91/180     | Group 4      | 44  | 271 | 16.24%     | Case series | NIH  | 7      | Interviewer, recall, responder            |
| Zhao H           | 2016 | China   | 36               | 32–86     | 0.25-26   | 157/253     | 252/158    | Group 4      | 48  | 410 | 11.71%     | Case series | NIH  | 7      | Interviewer, recall, responder            |
| Ling H           | 2017 | China   | 27.6(12-60)      | 27-69     | 0.5-11    | 141/159     | 124/176    | Group 3      | 37  | 300 | 12.33%     | Case series | NIH  | 8      | Interviewer, recall, responder            |
| Shi L            | 2017 | China   | 24               | 63.7±6.60 | 3-16      | 40/32       | /          | Group 4      | 6   | 60  | 10.00%     | Case series | NIH  | 7      | Interviewer, recall, responder            |
| Guo XF           | 2018 | China   | 22(3-48)         | 30-84     | 0.25-25   | 40/40       | 39/41      | Group 2      | 0   | 80  | 0.00%      | Case series | NIH  | 7      | Interviewer, recall, selection, responder |
| Zhang ZG         | 2018 | China   | 12               | 19-73     | 0.50-13   | 35/45       | 36/44      | Group 4      | 4   | 80  | 5.00%      | Case series | NIH  | 7      | Interviewer, recall, responder            |
| Song G           | 2018 | China   | 29.43(1-77)      | 25-81     | 0.08-25   | 120/166     | 103/183    | Group 4      | 28  | 260 | 10.77%     | Case series | NIH  | 9      | Interviewer, recall, responder            |
| Chai KJ          | 2018 | China   | 24(12-36)        | 36-86     | 0.17-30   | 31/42       | 29/44      | Group 3      | 11  | 73  | 15.07%     | Case series | NIH  | 6      | Interviewer, recall, responder            |
| Guo RZ           | 2018 | China   | 17.28(9.6-24.96) | 38-79     | 1-9       | 22/40       | /          | Group 2      | 3   | 62  | 4.84%      | Case series | NIH  | 7      | Interviewer, recall, responder            |
| Zheng JH         | 2018 | China   | 24               | /         | /         | /           | /          | Group 2      | 36  | 400 | 9.00%      | Case series | NIH  | 9      | Interviewer, recall, responder            |
| Wu A             | 2018 | America | 20.6(12-24)      | 53.3±13.3 | 4.87±5.77 | 158/301     | /          | Group 3      | 122 | 459 | 26.58%     | Case series | NIH  | 6      | Interviewer, recall, responder            |
| Jafree DJ        | 2018 | America | 60(14.4-105.6)   | 46.3-70.8 | 2.0-8.0   | 71/98       | 53/110     | Group 2      | 28  | 169 | 16.57%     | Case series | NIH  | 9      | Interviewer, recall, responder            |

|               |      |             |                |            |           |         |         |         |    |     |        |             |        |    |                                           |
|---------------|------|-------------|----------------|------------|-----------|---------|---------|---------|----|-----|--------|-------------|--------|----|-------------------------------------------|
| Zhang WD      | 2019 | China       | 31(12-48)      | 35-70      | 0.5-14    | 72/92   | 62/102  | Group 2 | 31 | 164 | 18.90% | Case series | NIH    | 9  | Interviewer, recall, responder            |
| Wang F        | 2019 | China       | 60             | 24-78      | /         | 118/94  | 96/114  | Group 4 | 7  | 212 | 3.30%  | Case series | NIH    | 7  | Interviewer, recall, responder            |
| Mastronardi L | 2019 | Italy       | 26(20.5-31.5)  | 40-84      | /         | 19/47   | /       | Group 2 | 7  | 66  | 10.61% | Case series | NIH    | 6  | Interviewer, recall, responder            |
| Cho DY        | 1992 | China       | 75.6(6-108)    | 36-80      | /         | /       | /       | Group 4 | 53 | 376 | 14.10% | NRCT        | Minors | 20 | Interviewer, recall, selection, responder |
| Walchenbach R | 1994 | Netherlands | 77.3(8-146)    | /          | /         | 40/19   | 25/32   | Group 3 | 8  | 50  | 16.00% | NRCT        | Minors | 19 | Interviewer, recall, selection, responder |
| Chen JF       | 2003 | China       | 24             | 24-87      | 0.25-22   | 102/139 | /       | Group 2 | 20 | 114 | 17.54% | NRCT        | Minors | 20 | Interviewer, recall, selection, responder |
| Zhang I       | 2004 | China       | 51(36-73)      | 70-79      | /         | 32/22   | /       | Group 4 | 4  | 37  | 10.81% | NRCT        | Minors | 18 | Interviewer, recall, selection, responder |
| Yan S         | 2008 | China       | 42(12-72)      | 32-79      | 0.25-25   | 84/97   | 67/114  | Group 2 | 15 | 160 | 9.38%  | NRCT        | Minors | 19 | Interviewer, recall, selection, responder |
| Linskey ME    | 2008 | America     | 40.8(2.04-102) | 36-92      | 0.33-40   | 33/47   | 33/47   | Group 2 | 7  | 36  | 19.44% | NRCT        | Minors | 19 | Interviewer, recall, selection, responder |
| Xu LS         | 2011 | China       | 60             | 35-78      | 0.58-9.17 | 89/143  | 101/131 | Group 4 | 7  | 80  | 8.75%  | NRCT        | Minors | 19 | Interviewer, recall, selection, responder |
| Zhu LX        | 2012 | China       | 40(10-70)      | /          | /         | /       | /       | Group 2 | 1  | 21  | 4.76%  | NRCT        | Minors | 18 | Interviewer, recall, selection, responder |
| Yan W         | 2013 | China       | 13.5(6-18)     | 40-73      | 1-12      | 32/43   | 35/40   | Group 4 | 10 | 60  | 16.67% | NRCT        | Minors | 19 | Interviewer, recall, selection, responder |
| Wang T        | 2013 | China       | 36(12-60)      | 45-65      | /         | 24/36   | /       | Group 4 | 1  | 28  | 3.57%  | NRCT        | Minors | 20 | Interviewer, recall, selection, responder |
| Wang H        | 2014 | China       | 36             | 30-75      | /         | /       | /       | Group 2 | 4  | 30  | 13.33% | NRCT        | Minors | 19 | Interviewer, recall, selection, responder |
| Luo WS        | 2014 | China       | 19(12-30)      | 19-84      | 0.25-25   | 106/112 | 92/116  | Group 4 | 1  | 94  | 1.06%  | NRCT        | Minors | 19 | Interviewer, recall, selection, responder |
| Dai YJ        | 2015 | China       | 42(12-72)      | 31-78      | 0.25-20   | 35/41   | /       | Group 4 | 3  | 38  | 7.89%  | NRCT        | Minors | 19 | Interviewer, recall, selection, responder |
| Yao CC        | 2015 | China       | 21(18-24)      | 28-94      | 0.25-23   | 85/68   | 83/70   | Group 2 | 1  | 28  | 3.57%  | NRCT        | Minors | 17 | Interviewer, recall, selection, responder |
| Wang L        | 2015 | China       | 21(6-36)       | 45-77      | 0.25-26   | 114/126 | 75/157  | Group 4 | 3  | 120 | 2.50%  | NRCT        | Minors | 20 | Interviewer, recall, selection, responder |
| Nanda A       | 2015 | America     | 63.6           | 61.3       | /         | 23/46   | /       | Group 3 | 4  | 20  | 20.00% | NRCT        | Minors | 18 | Interviewer, recall, selection, responder |
| Lian ZH       | 2016 | China       | 36             | 22-73      | 0.5-7.5   | 25/31   | 25/31   | Group 4 | 2  | 28  | 7.14%  | NRCT        | Minors | 20 | Interviewer, recall, selection, responder |
| Huang ZF      | 2016 | China       | 36             | 58.9±10.6  | 6.7±7.2   | 27/29   | 23/32   | Group 3 | 2  | 28  | 7.14%  | NRCT        | Minors | 22 | Interviewer, recall, selection, responder |
| Quan JJ       | 2016 | China       | 15(6-24)       | 27-80      | 2-12      | 47/63   | 49/61   | Group 4 | 9  | 55  | 16.36% | NRCT        | Minors | 19 | Interviewer, recall, selection, responder |
| Wang ZZ       | 2016 | China       | 21(6-36)       | 24-70      | 0.08-11   | 51/44   | 50/45   | Group 4 | 2  | 50  | 4.00%  | NRCT        | Minors | 19 | Interviewer, recall, selection, responder |
| Li GP         | 2016 | China       | 18             | 55-87      | /         | 42/82   | 48/54   | Group 2 | 11 | 62  | 17.74% | NRCT        | Minors | 20 | Interviewer, recall, selection, responder |
| Qin ZY        | 2016 | China       | 12             | 37-74      | 0.5-4.9   | 54/61   | 51/64   | Group 4 | 2  | 61  | 3.28%  | NRCT        | Minors | 19 | Interviewer, recall, selection, responder |
| Li S          | 2016 | China       | 12             | 30-73      | 0.25-20   | 33/39   | /       | Group 4 | 11 | 50  | 22.00% | NRCT        | Minors | 20 | Interviewer, recall, selection, responder |
| Dai ZF        | 2016 | China       | 24             | 26-89      | 0.25-20   | 90/112  | /       | Group 4 | 6  | 87  | 6.90%  | NRCT        | Minors | 19 | Interviewer, recall, selection, responder |
| Ning TY       | 2017 | China       | 12             | 46-76      | 3-9       | 48/52   | /       | Group 2 | 4  | 51  | 7.84%  | NRCT        | Minors | 19 | Interviewer, recall, selection, responder |
| Gao J         | 2017 | China       | 36             | 29-65      | 0.5-15    | 49/68   | /       | Group 2 | 8  | 52  | 15.38% | NRCT        | Minors | 20 | Interviewer, recall, selection, responder |
| Inoue T       | 2017 | Japan       | 39(12-115.2)   | 19-97      | 0.1-40    | 82/149  | /       | Group 2 | 11 | 179 | 6.15%  | NRCT        | Minors | 19 | Interviewer, recall, selection, responder |
| Wang LB       | 2018 | China       | 55.8(6-72)     | 76-90      | 0.50-30   | 60/73   | 67/66   | Group 2 | 7  | 80  | 8.75%  | NRCT        | Minors | 20 | Interviewer, recall, selection, responder |
| Li J          | 2018 | China       | 24             | 31-71      | 1-11      | 48/34   | 39/43   | Group 4 | 8  | 41  | 19.51% | NRCT        | Minors | 19 | Interviewer, recall, selection, responder |
| Li LL         | 2018 | China       | 26.11(19-37)   | 38-79      | 0.42-17   | 45/62   | 46/61   | Group 2 | 4  | 71  | 5.63%  | NRCT        | Minors | 20 | Interviewer, recall, selection, responder |
| Sun HS        | 2019 | China       | 12             | 56.25±8.34 | 5.47±1.31 | 34/48   | 42/40   | Group 4 | 7  | 41  | 17.07% | NRCT        | Minors | 19 | Interviewer, recall, selection, responder |
| Li BL         | 2019 | China       | 12             | 25-78      | 0.8-11    | 41/31   | /       | Group 4 | 1  | 36  | 2.78%  | NRCT        | Minors | 19 | Interviewer, recall, selection, responder |
| Cui YK        | 2019 | China       | 12             | 38-74      | 0.58-8    | 39/51   | 58/32   | Group 4 | 7  | 45  | 15.56% | NRCT        | Minors | 19 | Interviewer, recall, selection, responder |
| Wen X         | 2019 | China       | 19(12-60)      | 42-87      | 0.5-33    | 89/136  | 92/133  | Group 2 | 12 | 109 | 11.01% | NRCT        | Minors | 19 | Interviewer, recall, selection, responder |

|         |      |       |          |            |          |         |         |         |   |     |        |      |        |    |                                           |
|---------|------|-------|----------|------------|----------|---------|---------|---------|---|-----|--------|------|--------|----|-------------------------------------------|
| Zeng SY | 2019 | China | 12       | 69.3±15.6  | 20.1±6.2 | 24/30   | 30/24   | Group 4 | 1 | 36  | 2.78%  | NRCT | Minors | 21 | Interviewer, recall, selection, responder |
| Wang XZ | 2019 | China | 12       | 30-73      | 0.25-20  | 48/43   | /       | Group 4 | 0 | 45  | 0.00%  | NRCT | Minors | 19 | Interviewer, recall, selection, responder |
| Wang HX | 2019 | China | 14(8-24) | 33-80      | 1-13     | 78/122  | 101/99  | Group 4 | 2 | 100 | 2.00%  | NRCT | Minors | 19 | Interviewer, recall, selection, responder |
| Xing MY | 2019 | China | 12       | 40-75      | /        | 33/37   | 32/38   | Group 4 | 3 | 35  | 8.57%  | NRCT | Minors | 20 | Interviewer, recall, selection, responder |
| Li JC   | 2019 | China | 15(6-24) | 55-74      | /        | 20/33   | /       | Group 4 | 0 | 28  | 0.00%  | NRCT | Minors | 19 | Interviewer, recall, selection, responder |
| Zhao LF | 2019 | China | 24       | 13-85      | 0.1-30   | 187/254 | 202/239 | Group 2 | 1 | 220 | 0.45%  | NRCT | Minors | 19 | Interviewer, recall, selection, responder |
| Cai JH  | 2020 | China | 24       | 62.38±8.86 | 2-5.25   | 46/67   | /       | Group 4 | 3 | 60  | 5.00%  | NRCT | Minors | 20 | Interviewer, recall, selection, responder |
| Wang B  | 2020 | China | 12       | 27-78      | 2-10     | 47/63   | /       | Group 2 | 7 | 55  | 12.73% | NRCT | Minors | 20 | Interviewer, recall, selection, responder |

N/T, N: Number of patients who relapsed after the treatment, T: Number of patients who received the treatment; NRCT, nonrandomized controlled trials; Group 1: Has ever experienced MVD, Group 2: Never experienced MVD, Group 3: Other surgery treatment, Group 4: Uncertain. Interviewer bias was defined as "a systematic difference between how information was solicited, recorded or interpreted," which occurred when the interviewer was not blinded. Possible recall bias occurred when the outcomes of treatment affected the patient's memory for previous events. Selection bias referred to patients dropping out or failing to follow-up or if the exposure and outcome had already occurred prior to patient selection. Response bias described the bias that occurred with self-report and surveys.

### Recurrence rate after trigeminal neuralgia surgery

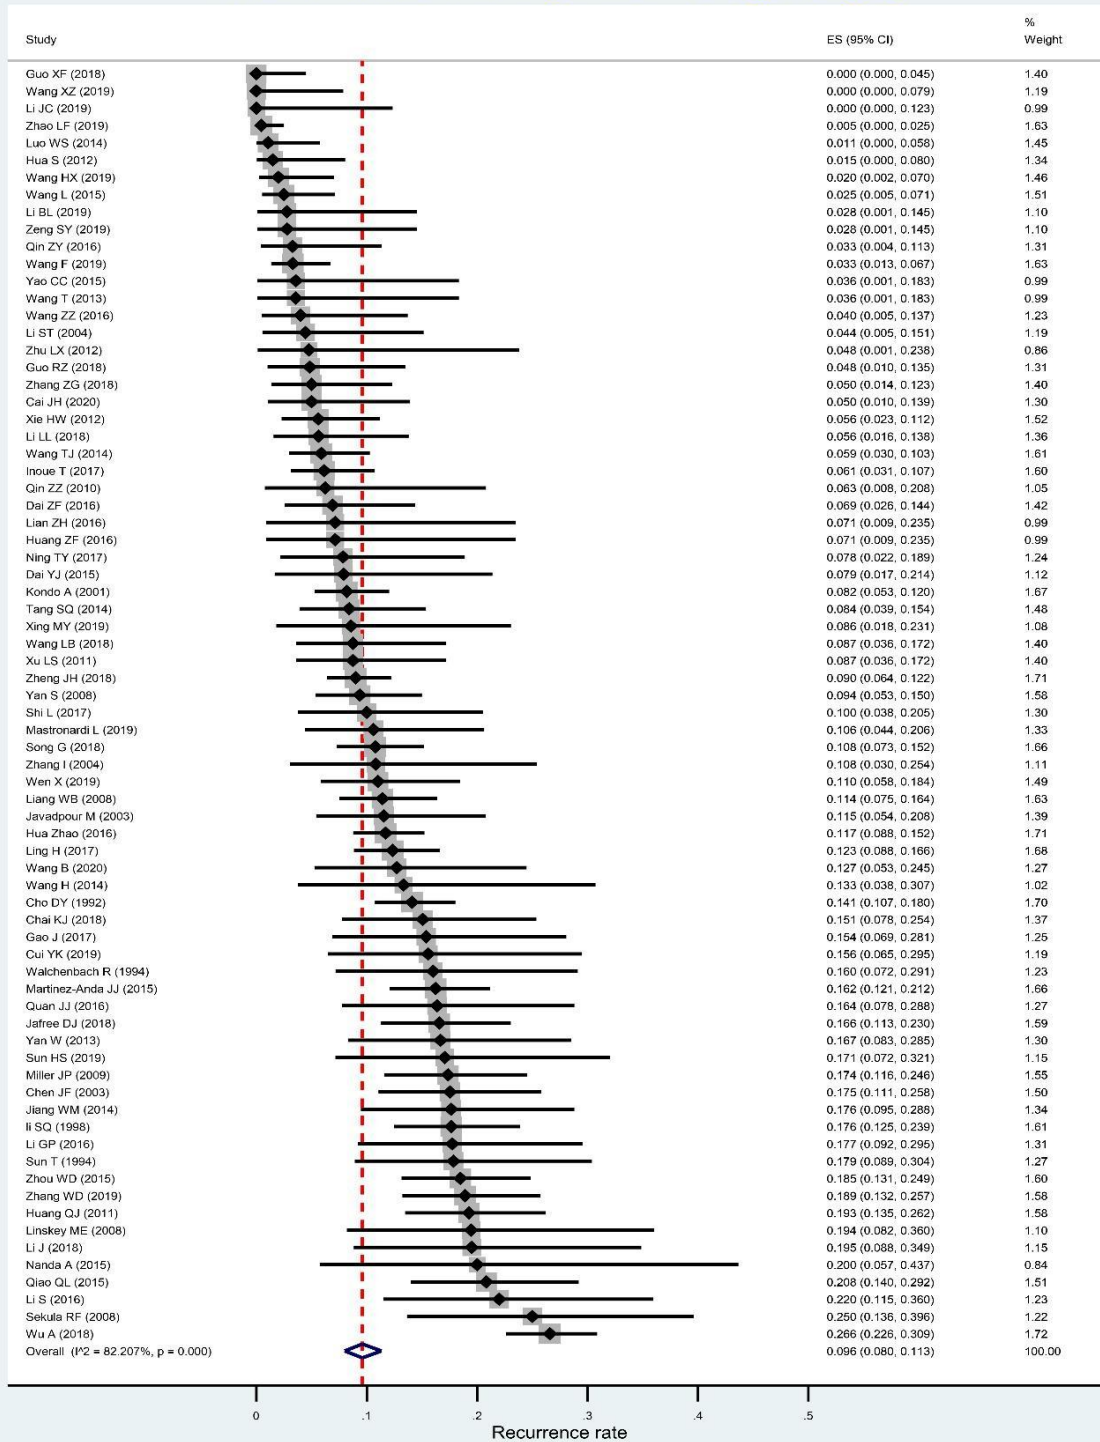

**Supplementary Figure 1.** Forest plot displaying the reported recurrence rates of included studies after microvascular decompression for primary trigeminal neuralgia.



# Meta-analysis random-effects estimates (linear form)

## Study omitted

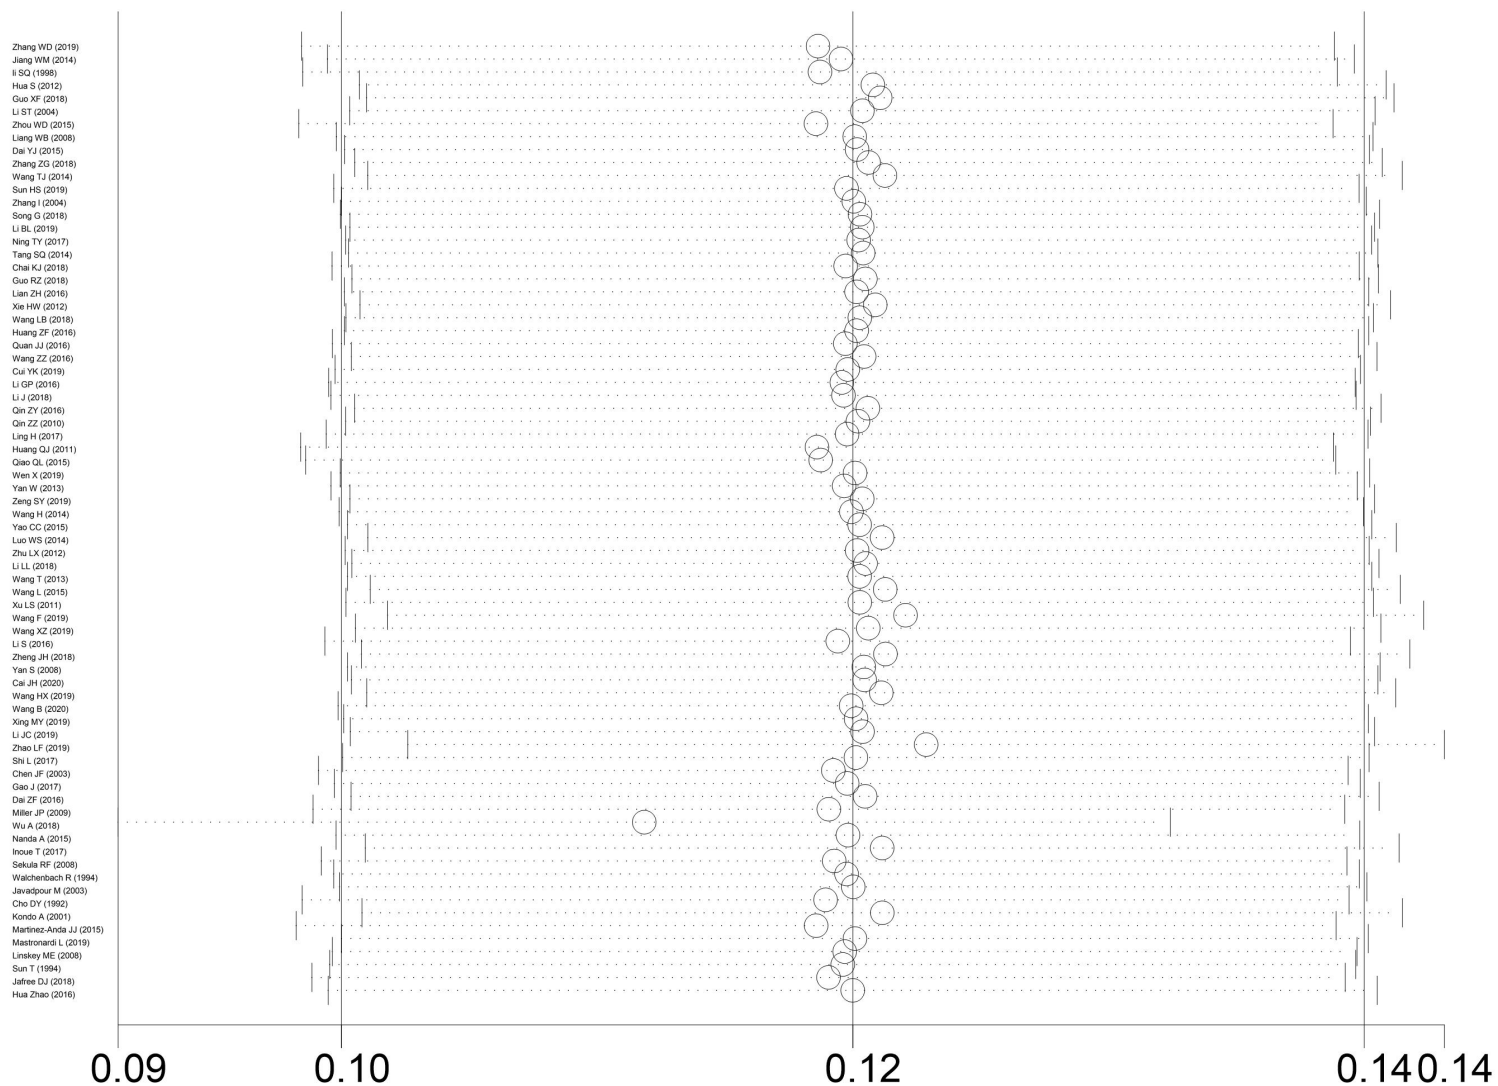

Supplementary Figure 4. Sensitivity analysis with the leave-one-out meta-analysis among 74 studies included in our research.
